# Supplementary material for: Hydrogen-bonded liquid crystals formed from 4-alkoxystilbazoles and chlorophenols
Source: Royal Society of Chemistry journal article supplement (doi:10.1039/d3ce00266g), 2023-01-01
Supplement: d3ce00266g1.pdf [file d3ce00266g1.pdf]

## **Hydrogen-bonded Liquid Crystals formed from 4-Alkoxy stilbazoles and Chlorophenols**

**Oliver D. Johnson, Stephen G. Wainwright,  
Adrian C. Whitwood and Duncan W. Bruce\***

Department of Chemistry  
University of York  
Heslington  
YORK YO10 5DD (UK)  
Tel: (+44) 1904 324085  
E-mail: [duncan.bruce@york.ac.uk](mailto:duncan.bruce@york.ac.uk)

**Supplementary Information**

## Preparation

Chlorophenols were obtained commercially, while stilbazoles were prepared using the Siegrist protocol described previously.<sup>1</sup>[Huck]

Complexes were prepared dissolving the stilbazole (30 mmol) in pentane for **St8** or hexane for **St12** (50 cm<sup>3</sup> in each case) to which was added a solution of the chlorophenol (30 mmol) in the same solvent (10 cm<sup>3</sup>). The solution was stirred for 90 minutes after which the flask was sealed with a suba seal through which was inserted a syringe needle. The flasks were then left at ambient temperature for 1-2 weeks until an appreciable yield of crystals was obtained. The crystals were recovered by filtration and washed carefully with cold solvent of crystallisation before being air-dried.

## Single-crystal X-ray

Diffraction data were collected at 110 K on a Bruker Smart Apex diffractometer with Mo-K<sub>α</sub> radiation ( $\lambda = 0.71073 \text{ \AA}$ ) using a SMART CCD camera. Diffractometer control, data collection and initial unit cell determination was performed using 'SMART'.<sup>2</sup> The crystal was cooled with an Oxford Cryostream. Frame integration and unit-cell refinement was carried out with 'SAINT+'.<sup>3</sup> Absorption corrections were applied by SADABS.<sup>4</sup> Structures were solved by 'direct methods' using SHELXS-97 (Sheldrick, 1997)<sup>5</sup> and refined by full-matrix least squares using SHELXL-97 (Sheldrick, 1997).<sup>6</sup> All non-hydrogen atoms were refined anisotropically. O-H hydrogens were located by difference map after all other atoms had been located and refined.

## Mesophase Characterisation

Polarised optical microscopy employed an Olympus BX50 Optical Microscope equipped with a Link-Am HFS91 hot stage, TMS92 controller and LNP2 cooling unit.

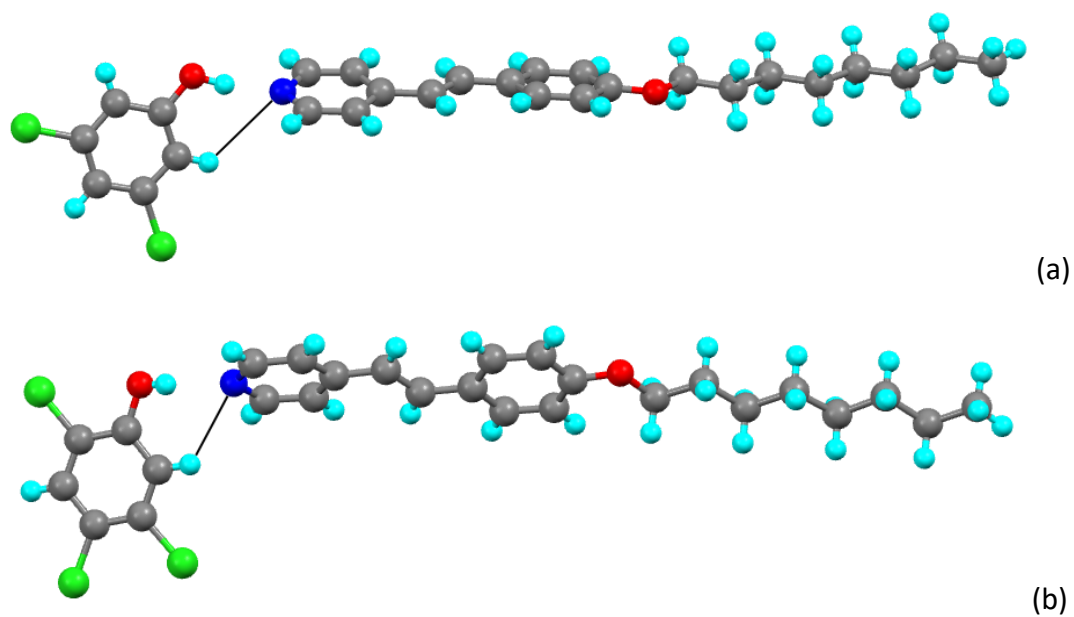

Figure S1 Hydrogen bonded complex for (a) **8St-b** and (b) **8St-d** showing possible intra-complex N $\cdots$ H interaction.

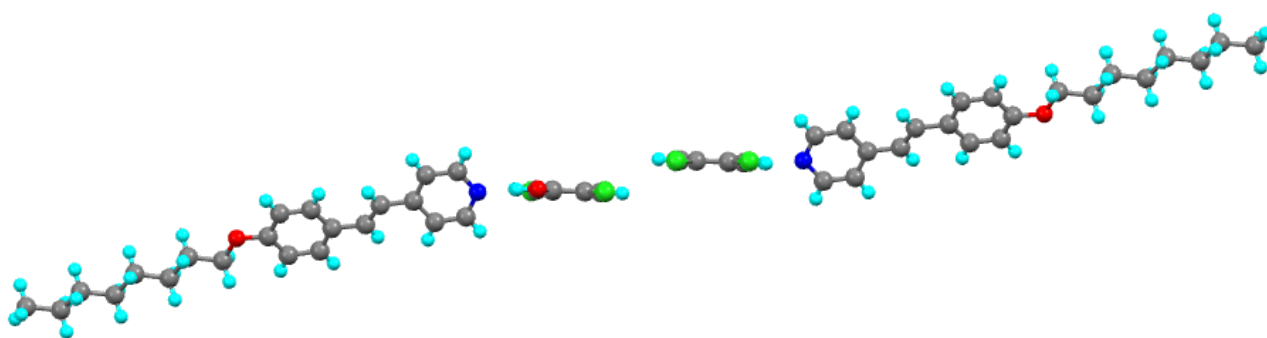

Figure S2 Side view of the dimeric unit in the structure of **8St-e**.

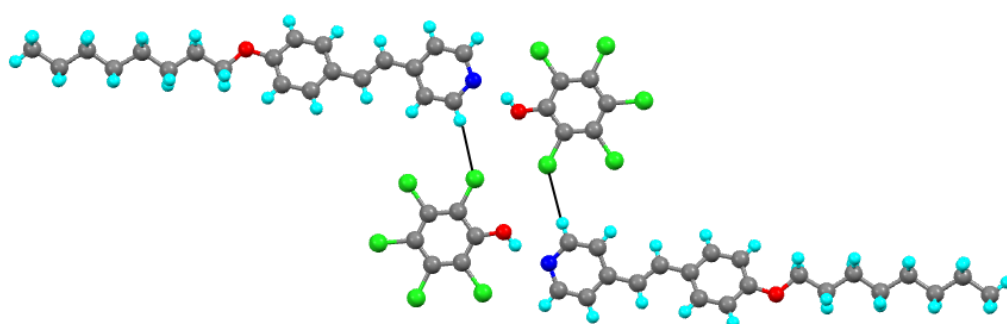

Figure S3 Diagram to show the possible inter-complex Cl $\cdots$ H interactions in **8St-f**.

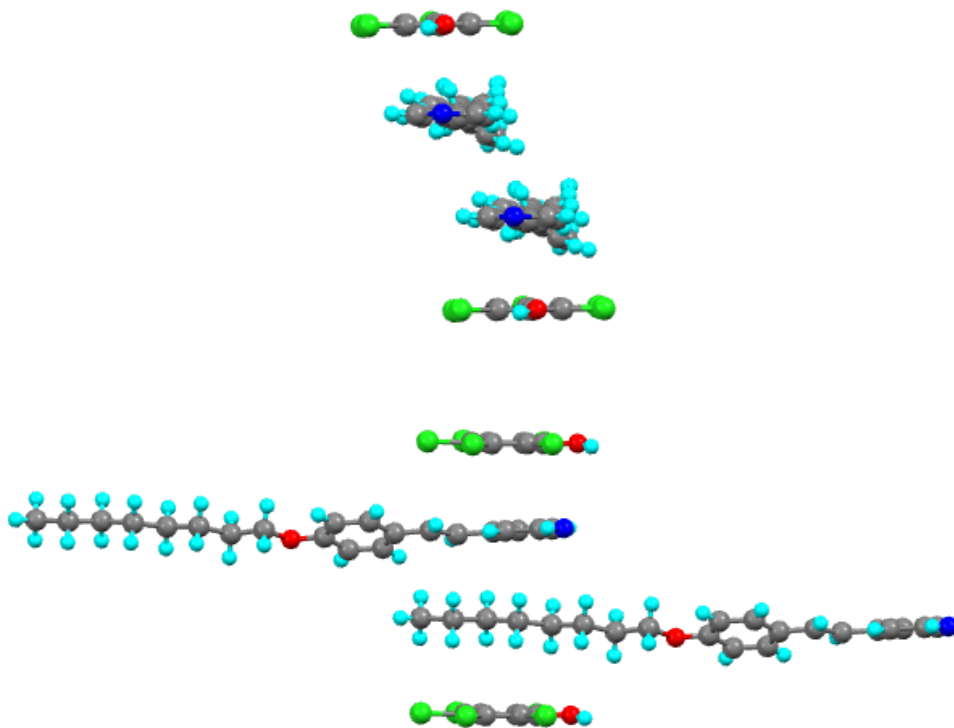

Figure S4 Two different side-on views (effectively perpendicular to the *b*-axis) of the stacking in **St8-f**.

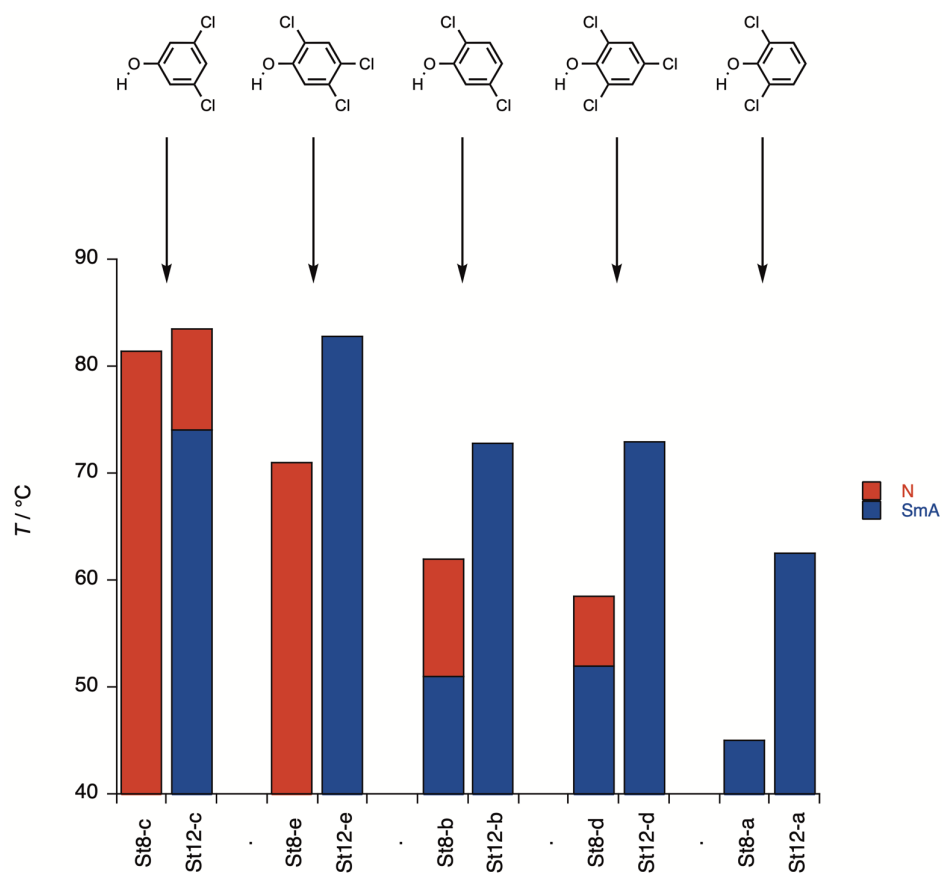

Figure S3 Clearing points of the new complexes plotted from left to right as a function of decreasing clearing point.

---

## References

- 1 D. M. Huck, H. L. Nguyen, B. Donnio and D. W. Bruce, *Liq. Cryst.*, 2004, **31**, 503-507.
- 2 'SMART' - control software Bruker SMART Apex X-ray Diffractometer. v5.625, Bruker-AXS GMBH, Karlsruhe, Germany.
- 3 'SAINT+' - integration software for Bruker SMART detectors. v6.45, Bruker-AXS GMBH, Karlsruhe, Germany.
- 4 'SADABS' - program for absorption correction. v2.10. G. M. Sheldrick, Bruker AXS Inc., Madison, Wisconsin, USA, **2007**.
- 5 SHELXS-97' - program for structure solution. G. M. Sheldrick, University of Göttingen, Göttingen, Germany, **1997**.
- 6 SHELXL-97' - program for the Refinement of Crystal Structures. G. M. Sheldrick, University of Göttingen, Göttingen, Germany, **1997**.
